# Supplementary material for: Cooperation of multiple CH⋯π interactions to stabilize polymers in aromatic nanochannels as indicated by 2D solid state NMR
Source: Royal Society of Chemistry journal article supplement (doi:10.1039/b316855g), 2004-01-01
Supplement: b316855g.doc [file b316855g.doc]

# Supplementary Information

Cooperation of multiple CH••• interactions

to stabilize polymers in aromatic nanochannels as indicated by 2D solid state NMR

Piero Sozzani,* Angiolina Comotti, Silvia Bracco and Roberto Simonutti

Department of Materials Science, University of Milano Bicocca, Via R. Cozzi 53, Milan, Italy. Fax: 02 6448 5400; Tel: 02 6448 5124; E-mail: piero.sozzani@unimib.it

(Total 4 pages including this cover page)

**Table of Contents**

Materials ……………………………………………………. p. 2

Experimental NMR …………………………………………. p. 2

NMR Background …………………………………………… p. 2

PMLG (1H-13C) HETCOR spectra of TPP/PTHF adduct …… p. 3

2H NMR of TPP/PE-d4 adduct ………………………………. p. 4

References …………………………………………………… p. 4

# Materials

TPP was synthesized by our group following the procedure previously reported.1 The TPP/PE adduct dispersed in PE matrix was prepared by intimately mixing together the two components TPP and PE (high density polyethylene, Mn and Mw are 1.75x104 and 7.49x104 respectively) in the powder form with a TPP/PE ratio of 10:0.7 w/w, melting them together at 270°C under inert atmosphere for four 10-min intervals. The TPP/PTHF adduct was obtained by crystallization from a benzene solution containing PTHF (Mn 2900, Terathane® DuPont) with a TPP/PTHF ratio of ca. 10:1.5 w/w. The TPP/PE-d4 (Merck & Co., 99% **enriched**) adduct was formed by heating at 120 °C for 10 min and then at 270 °C for 1 hour an intimate mixture of TPP and PE-d4 (ratio 10:0.7 w/w).

**Experimental NMR**.

Phase-Modulated Lee-Goldburg (PMLG) heteronuclear (1H-13C) correlation (HETCOR) spectra were run at 75.5 MHz, on a Bruker Avance 300 instrument operating at a static field of 7.04 T. A MAS Bruker probe head was used with 4 mm ZrO2 rotors spinning at a standard speed of 15 kHz. 90° pulse for proton was 2.9 s. LG period was usually 18.9 s. Quadrature detection in t1 was achieved using TPPI method. RAMP-CP2 is obtained changing the strength of the proton rf from 80 kHz at the beginning of the contact time to a value of 40 kHz at the end of the cross polarization period in 100 steps. Cross-polarization times of 1 ms, 5 ms and 10 ms were applied on each sample. Carbon signals (t2) are acquired under proton decoupling, applying two pulse phase modulation scheme (TPPM)3. Particular care must be paid when the chemical shift values in F1 dimension are taken into account, since the chemical shift dispersion is scaled by a factor of 1/3 compared to what obtained in a directly detected 1H spectrum. Moreover, a mismatch of the Lee-Goldburg condition might lead to a different scaling. Therefore, the chemical shift and the effectiveness of PMLG must be confirmed by a comparison to a 1H spectrum.

In order to obtain undistorted deuterium line shapes, the solid-echo sequence (/2x-1-/2y-2-aq) was applied. We used 1.9-2.2 s for the /2 pulse, depending on temperature.

**NMR Background**.

Fast MAS (12.5 kHz spinning) averages the chemical shift anisotropy (CSA) of 13C nuclei and practically reduces to zero the spinning side bands, reducing dramatically the complexity of the carbon spectrum, especially in systems containing carbons with large CSA as aromatic carbons. Multipulse decoupling schemes as CRAMPS techniques are not well suited for high spinning speed, in fact their complex pulse trains can be too long, compared with the rotor cycle, causing interference between the sample spinning and multipulse decoupling and an overall reduction of the effectiveness of decoupling. Thus, for obtaining a good proton homonuclear decoupling with fast MAS, Lee-Goldburg (LG) irradiation was successfully applied.4 The full cycle time for LG decoupling is typically less then 20 s and significantly shorter than the rotor period at spinning speed of 15 kHz. The key point of the Lee and Goldburg approach is the use of an *rf* field producing an effective field in the rotating frame inclined at the magic angle in respect to the static field. The fast precession of the spins about the magic-angle axis causes the zero-order average dipolar hamiltonian to vanish. In order to obtain a higher decoupling efficiency different strategies have been proposed, a rather effective sequence has been presented by Vega and co-workers5: in the so called phase-modulated Lee-Goldburg experiment (PMLG) the effective field at the magic angle is obtained by a series of adjacent phase shifted pulses. The pulse 2D 1H-13C HETCOR sequence used in this work exploits the PMLG approach and is reported in Figure S1.


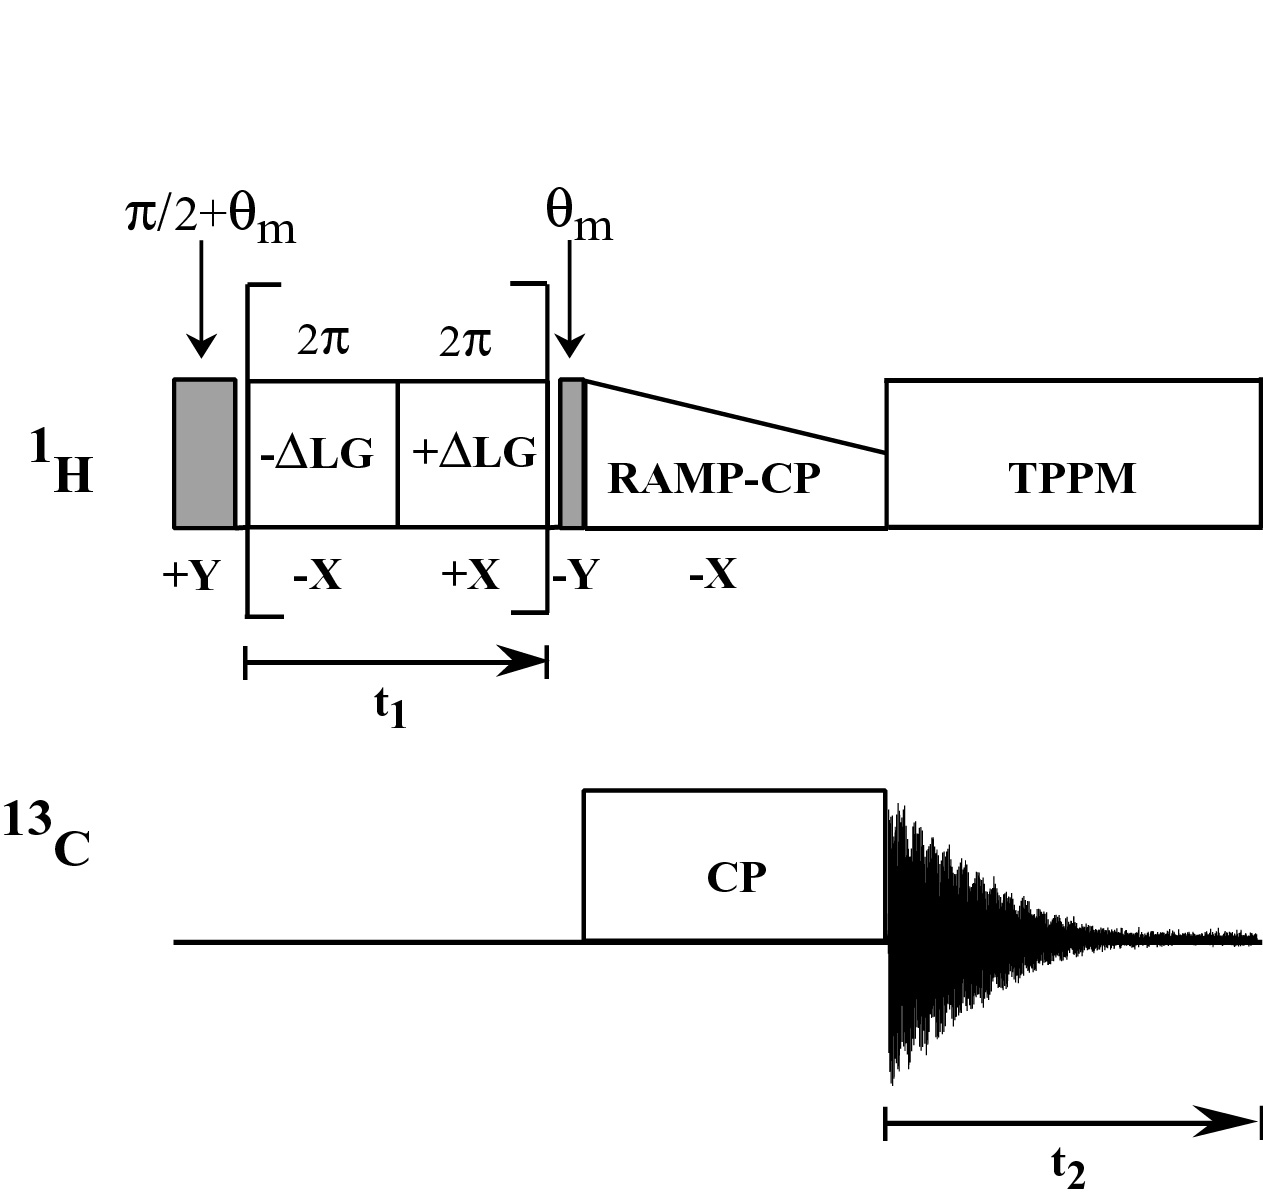


**Figure S1** A (/2+m)y preparation pulse puts the 1H polarization perpendicular to z axis of the effective field in the tilted rotating frame, during t1 a PMLG irradiation sequence is applied. At the end of t1 a m pulse brings back the magnetization into the xy plane. In order to have an efficient transfer of magnetization to the carbon nuclei under fast MAS during the contact time a RAMP-CP is applied, this procedure restores a broader matching profile between proton and carbon nuclei. During acquisition TPPM heteronuclear decoupling is applied

**PMLG (1H-13C) HETCOR spectra of TPP/PTHF adduct.**

In Figure S2 the PMLG (1H-13C) HETCOR spectra of TPP/PTHF adduct are depicted together with its projections. The use of short contact time (1ms, Figure S2a) limits the magnetization transfer from protons only to the closer carbons. The aromatic carbon peaks on the phosphazene host correlate with the single peak of the aromatic protons; while the polymeric guest carbons (25.18 ppm for CH2 and 70.63 ppm for CH2-O) show the correlations to well resolved aliphatic protons.

PMLG (1H-13C) HETCOR spectrum with long contact times was performed (Figure S2b). Here also the cross-peaks due to the intermolecular interactions are clearly evident. All the peaks are correlated, indicating a single extended phase constituted by PTHF chains in close contact with aromatic groups.


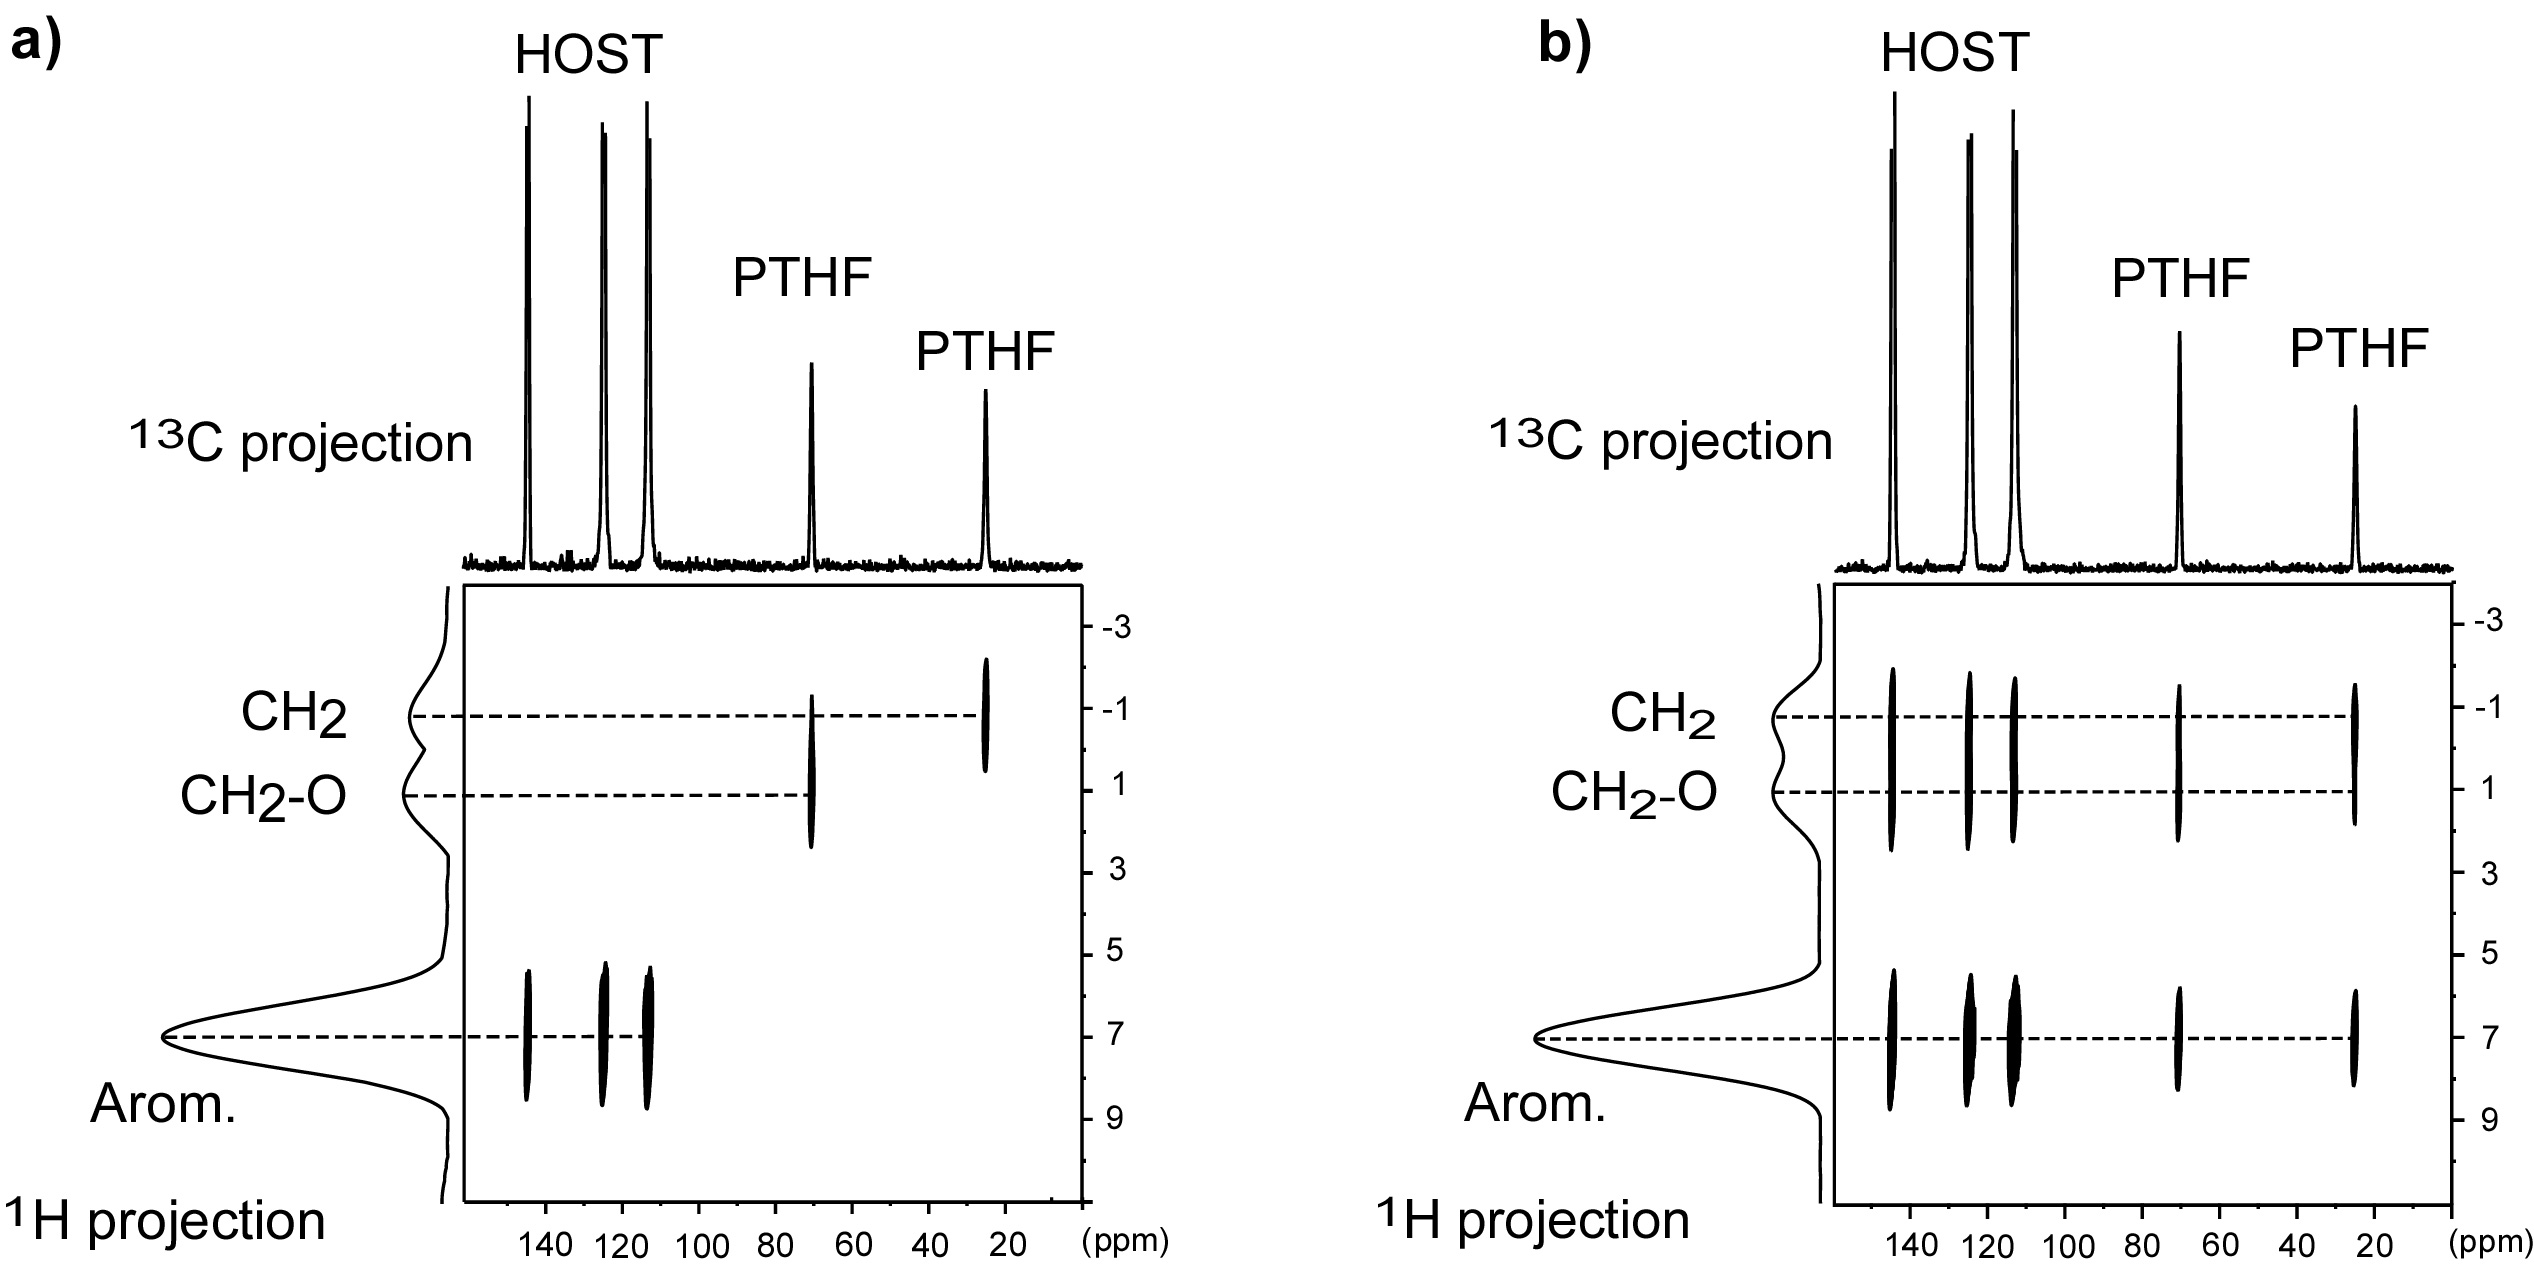


**Figure S2** PMLG HETCOR spectra of TPP/PTHF adduct. a) 1 ms of contact time was used, b) 10 ms of contact time was used.

**2H NMR of TPP/PE-d4 adduct.**


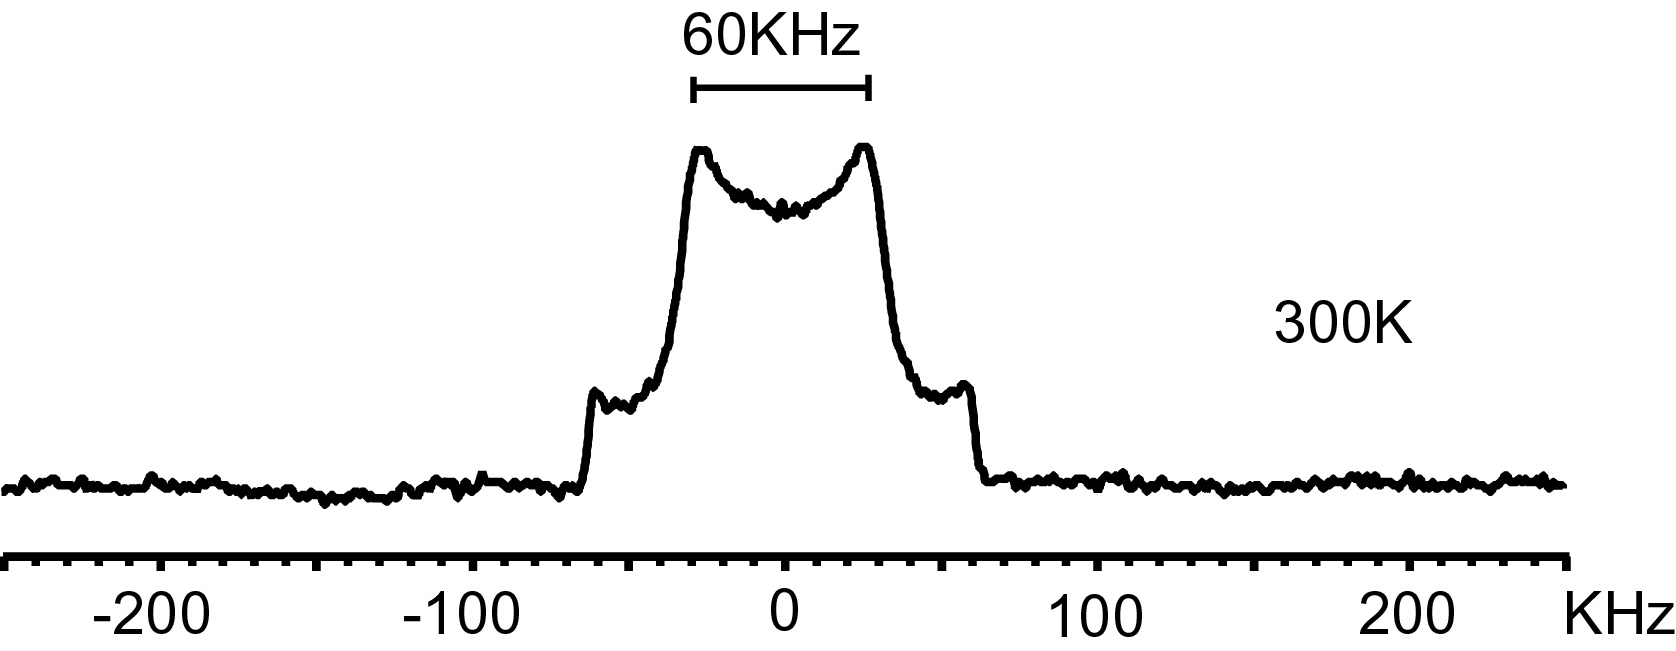


**Figure S3** 2H solid-echo NMR spectrum of TPP/PE-d4 adduct**.**

## References

(1) Comotti, A.; Simonutti, R.; Catel, G.; Sozzani, P. *Chem. Mater.*, **1999**, *11*, 1476-1483.

(2) Metz, G.; Wu, X.; Smith, S.O. *J. Magn. Reson. A* **1994**, *110*, 219-227.

(3) Bennet, A.E.; Rienstra, C.M.; Auger, M.; Lakshmi, K.V.; Griffin, R.G. *J. Chem. Phys.* **1995**, *103*, 6951-6958.

(4) Van Rossum, B.-J.; Förster, H.; de Groot, H.J.M. *J. Magn. Reson.* **1997**, *124*, 516-519.

(5) Vinogradov, E.; Madhu, P.K.; Vega, S. *Chem. Phys. Lett.* **1999**, *314*, 443-450.
